# Supplementary material for: Influence of Granulometry on Thermal and Mechanical Properties of Cement Mortars Containing Expanded Perlite as a Lightweight Aggregate
Source: MDPI journal article supplement (doi:10.3390/ma12234013), 2019-12-03
Supplement: s1 [file s1]

# Supplementary Materials: Influence of Granulometry on Thermal and Mechanical Properties of Cement Mortars Containing Expanded Perlite as a Lightweight Aggregate

Matías Leyton-Vergara <sup>1</sup>, Alexis Pérez-Fargallo <sup>1</sup>, Jesús Pulido-Arcas <sup>1</sup>, Galo Cárdenas-Triviño <sup>2</sup> and Jeremy Piggot-Navarrete <sup>3,\*</sup>

<sup>1</sup> Department of Building Science, University of Bio-Bio, Concepción, 4030000, Chile.

<sup>2</sup> Department of Wood Engineering, University of Bio-Bio, Concepción, 4030000, Chile.

<sup>3</sup> Department of Design and Theory of Architecture, University of Bio-Bio, Concepción, 4030000, Chile.

\* Correspondence: jpiggot@ubiobio.cl

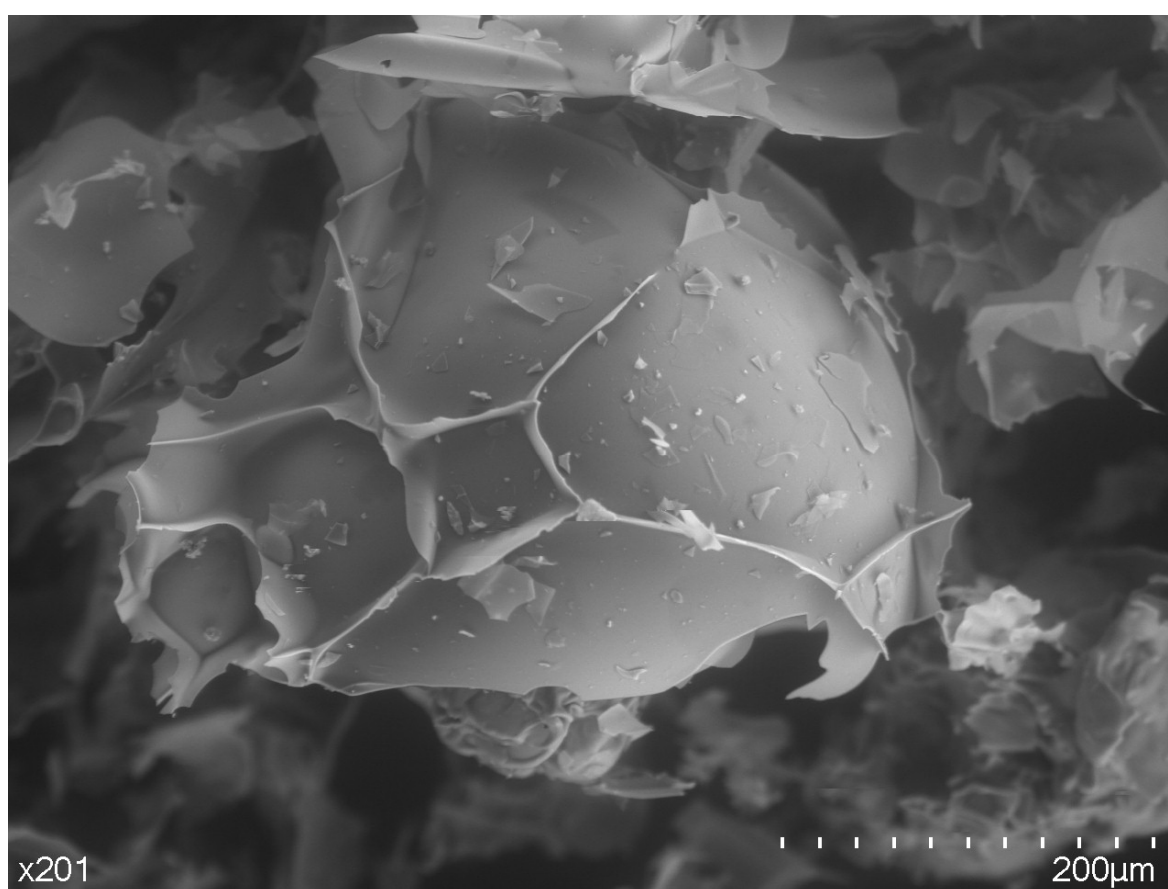

**Figure S1.** 1-S0.15—SEM image of expanded perlite size 0.15 mm.

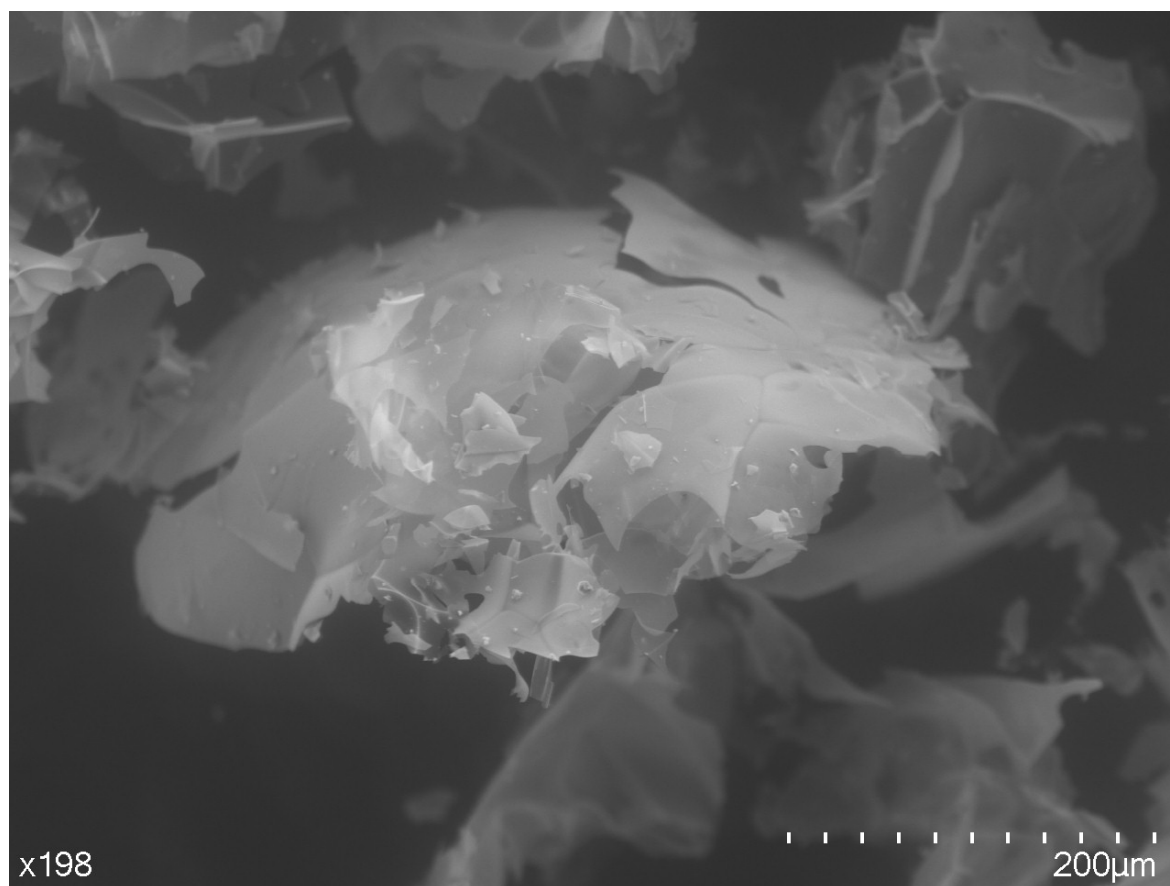

**Figure S2.** 2-S0.15—SEM image of expanded perlite size 0.15 mm.

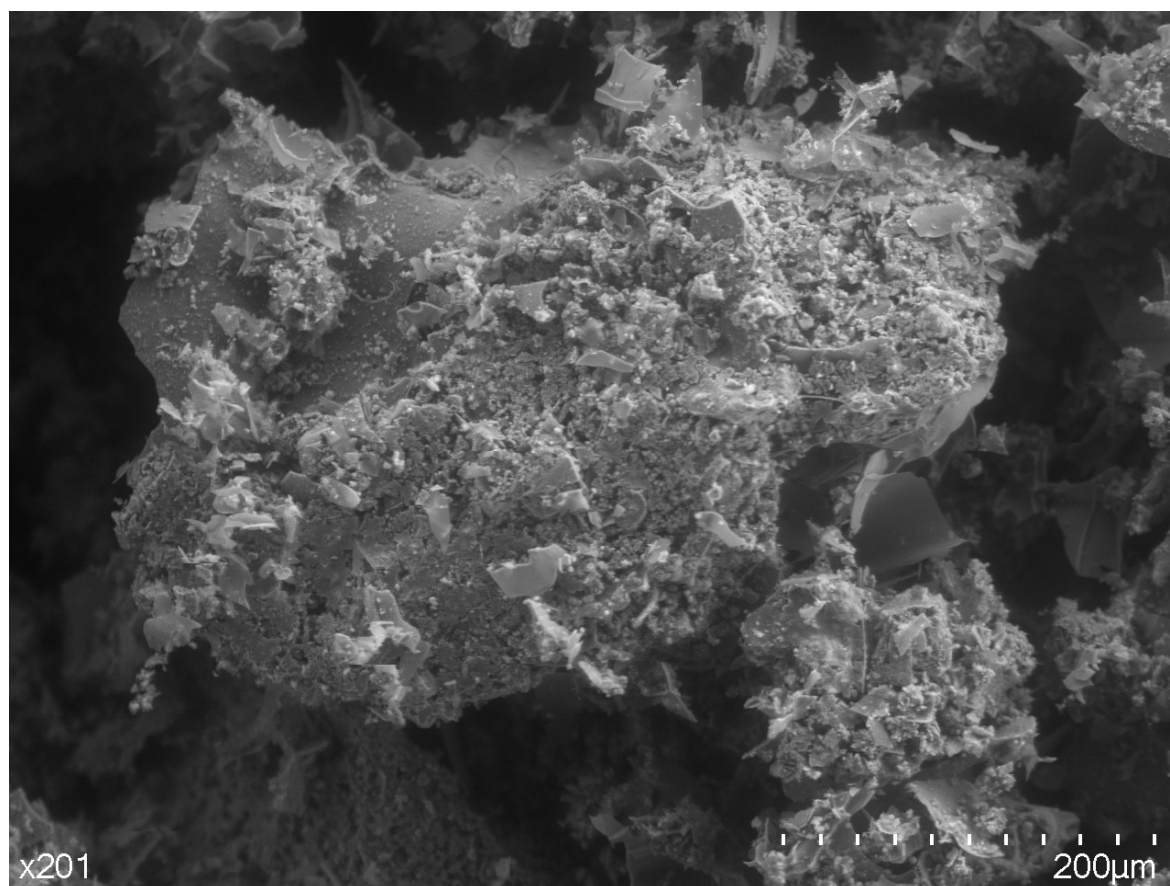

**Figure S3.** 3-S0.15—SEM image of cement interface for 0.15 mm.

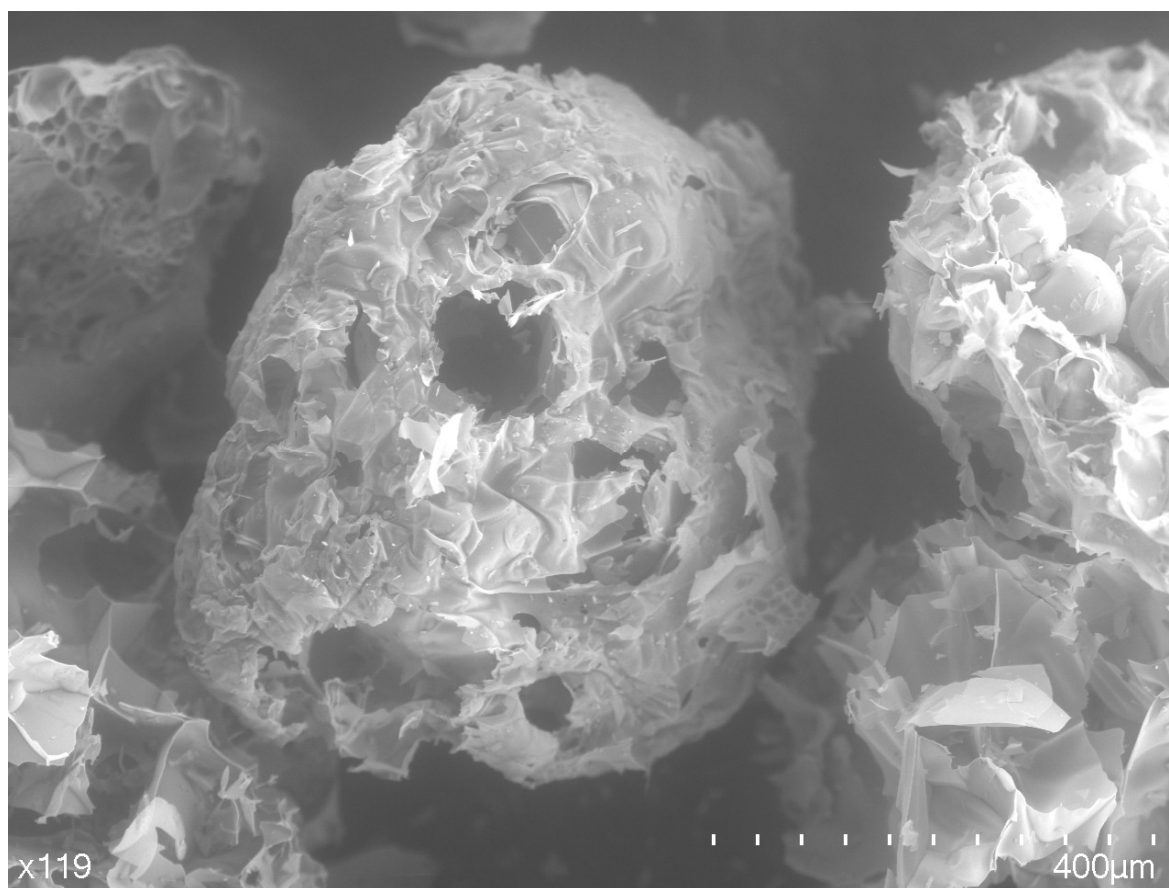

**Figure S4.** 1-S0.30—SEM image of expanded perlite size 0.30 mm.

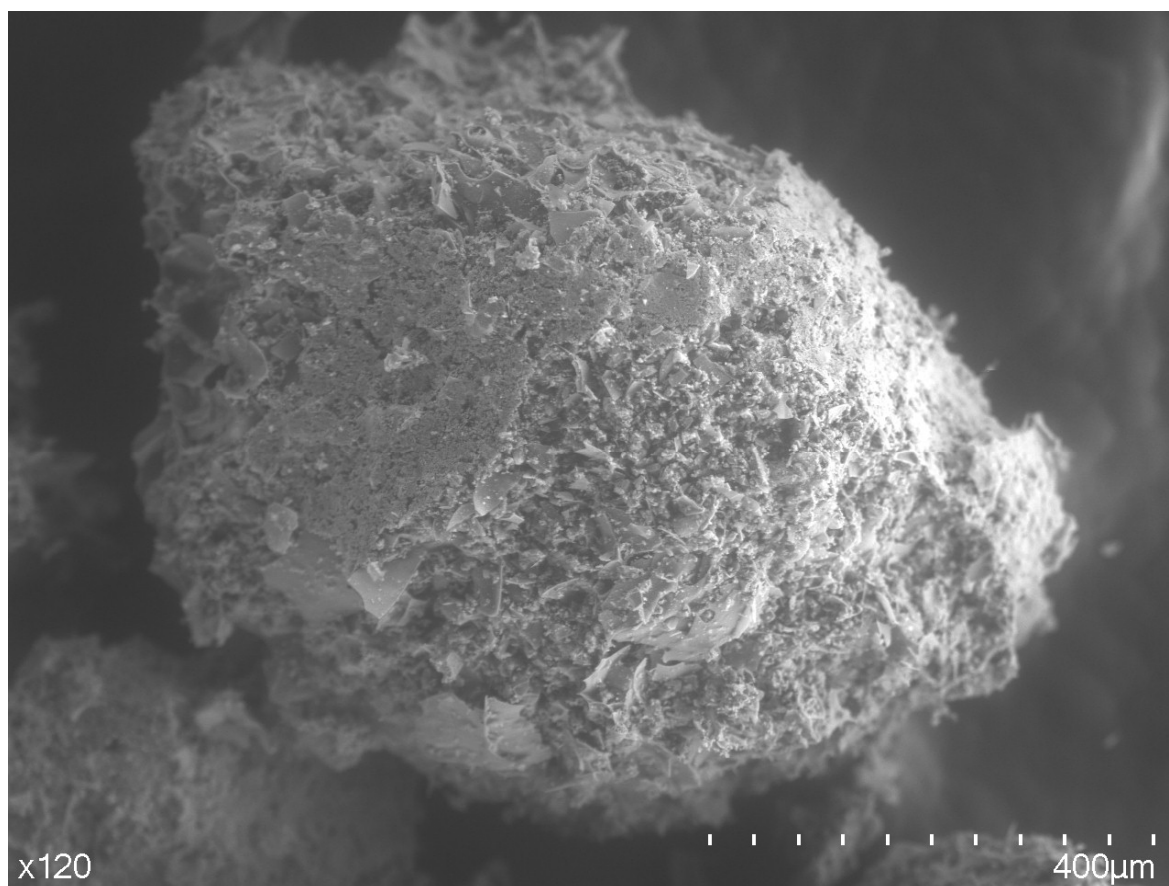

**Figure S5.** 2-S0.30—SEM image of cement interface for 0.30 mm.

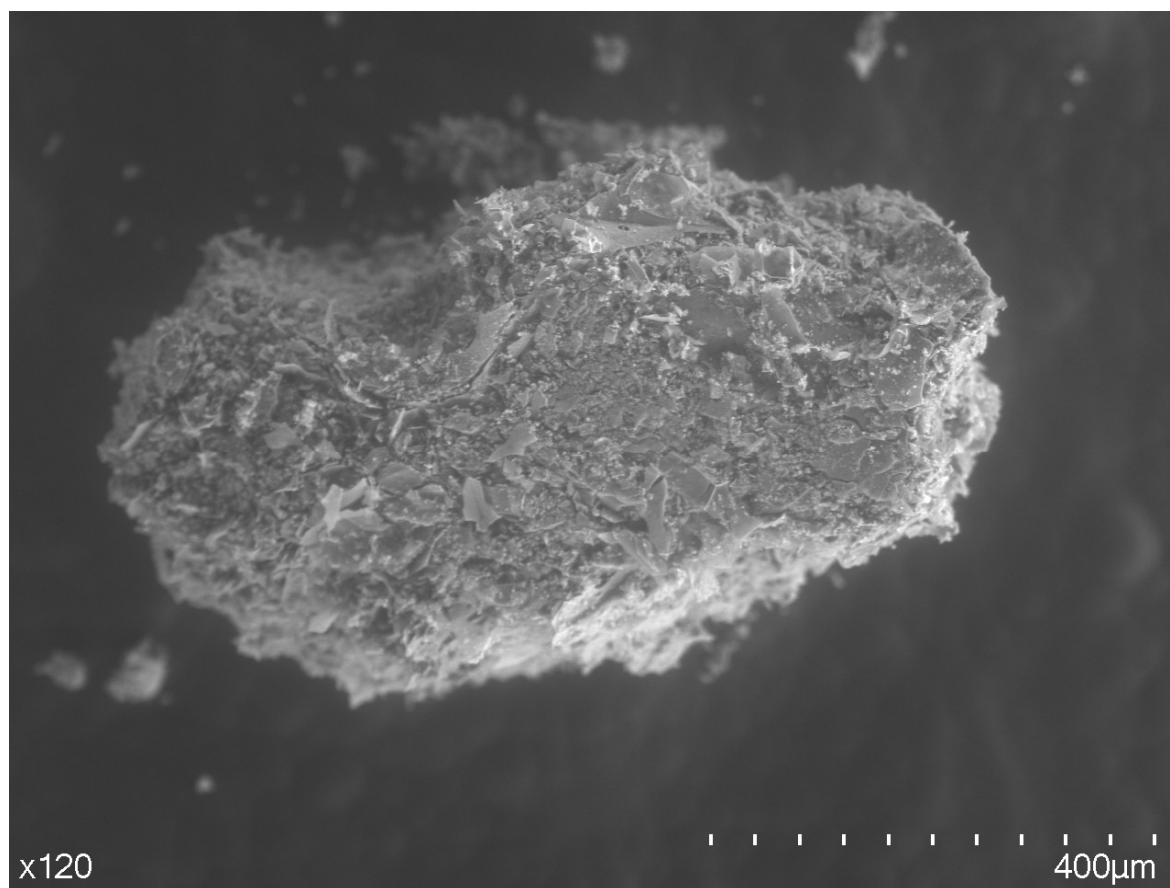

**Figure S6.** 3-S0.30—SEM image of cement interface for 0.30 mm.

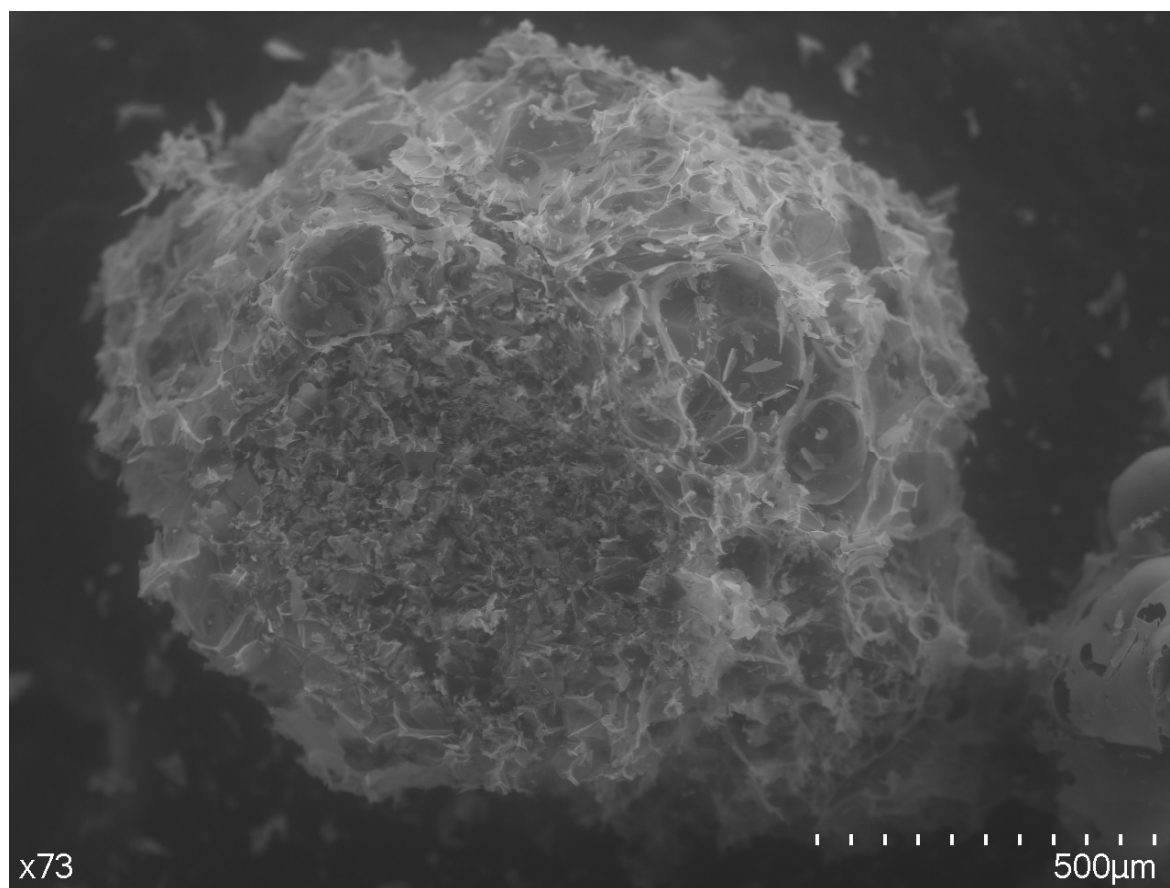

**Figure S7.** 1-S0.60—SEM image of expanded perlite size 0.60 mm



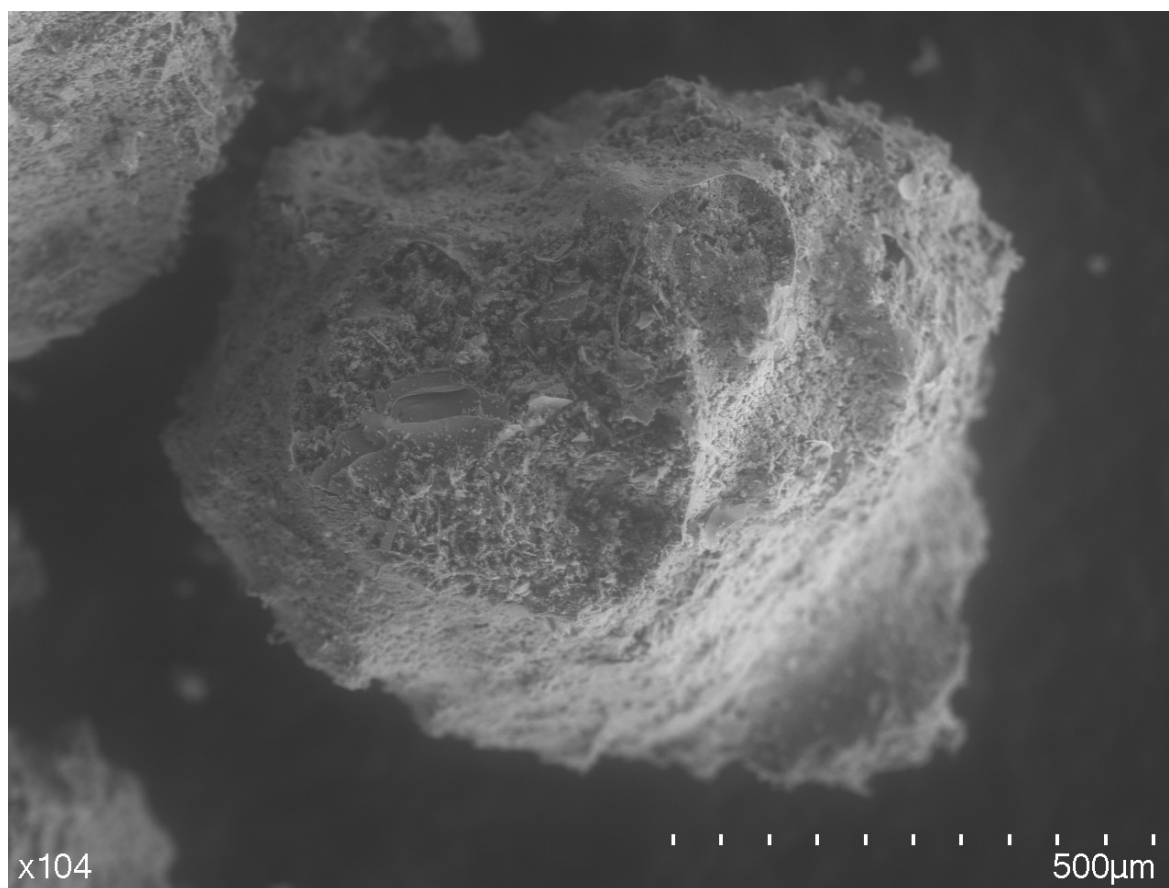

**Figure S8.** 2-S0.60—SEM image of cement interface for 0.60 mm.

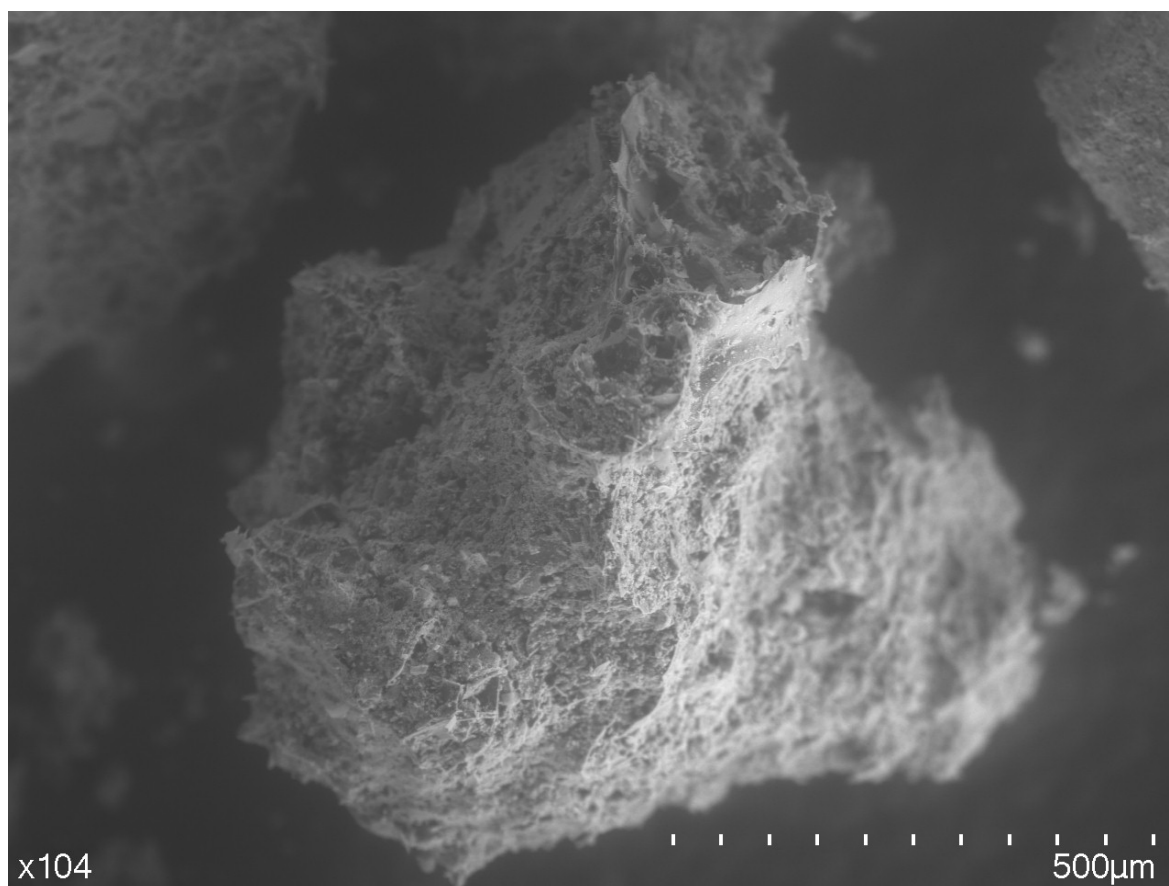

**Figure S9.** 3-S0.60—SEM image of cement interface for 0.60 mm.

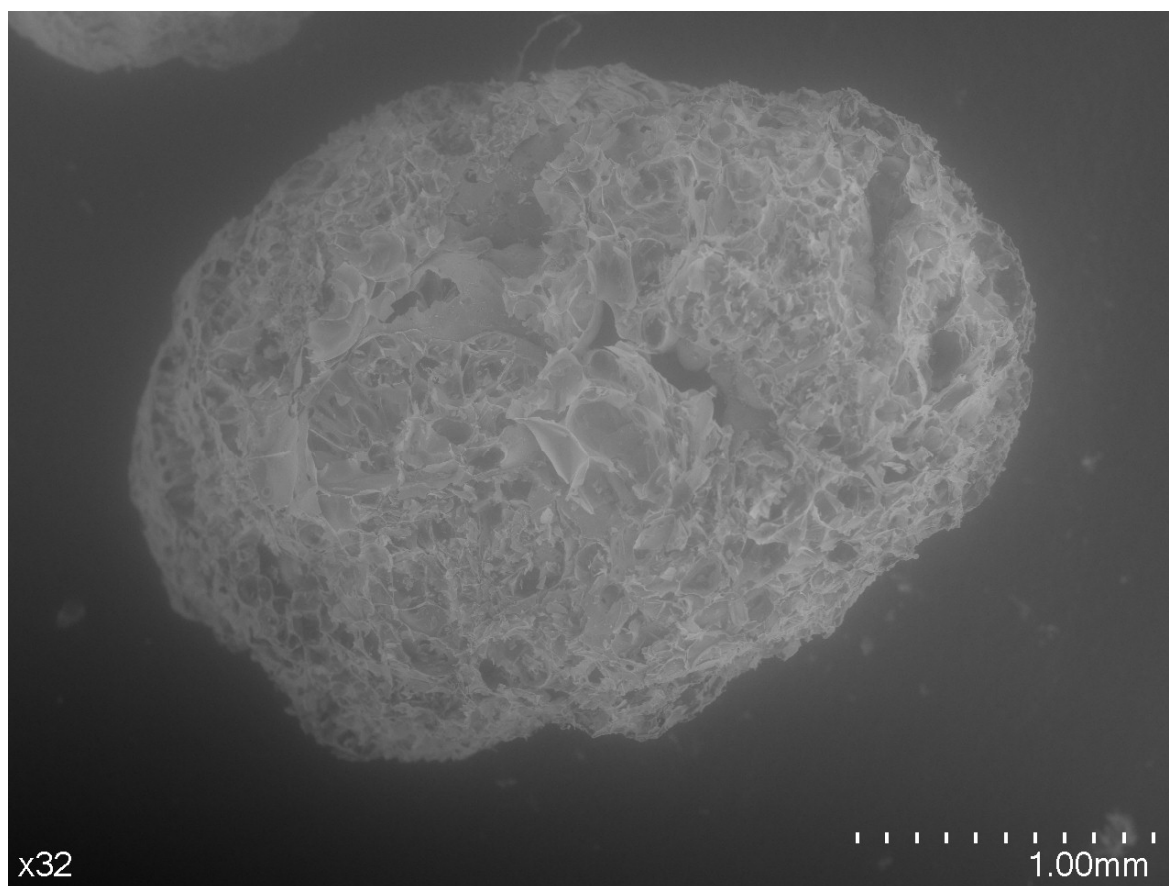

**Figure S10.** 1-S1.18—SEM image of expanded perlite size 1.18 mm.

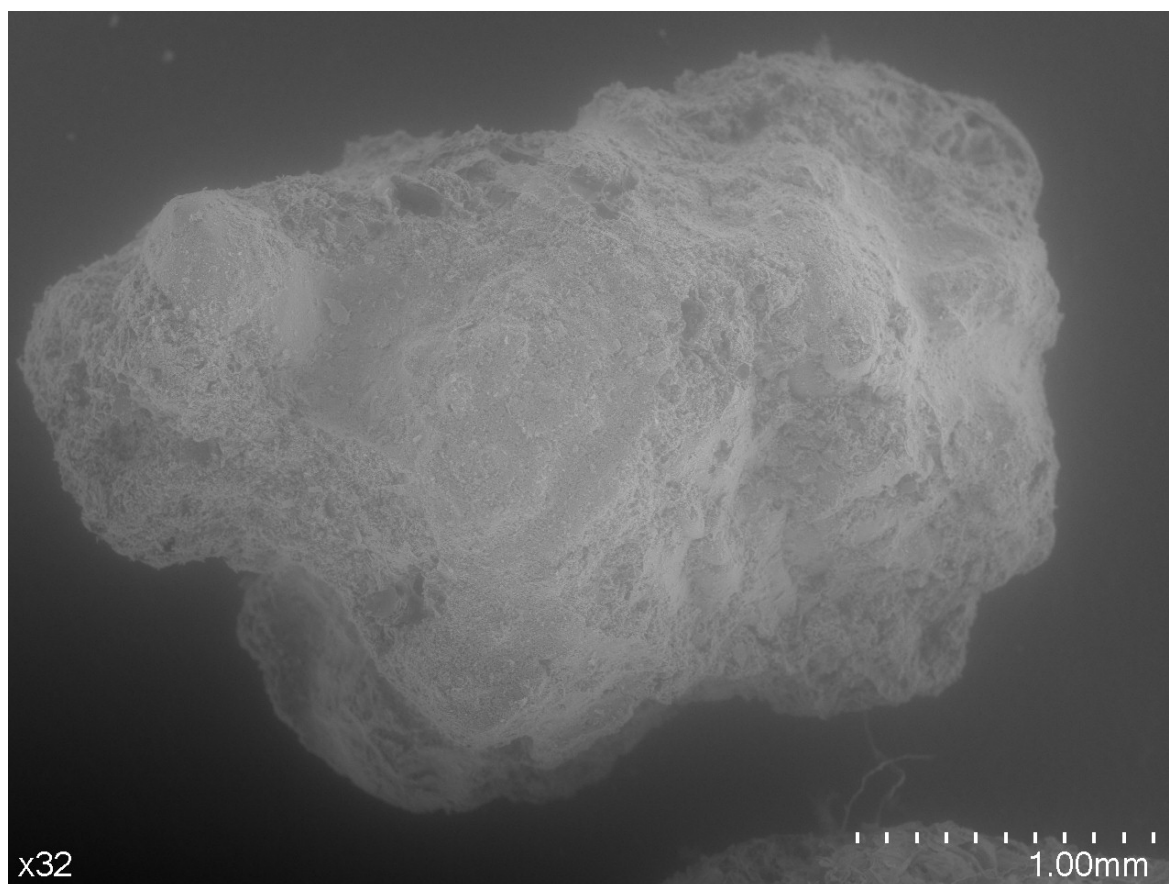

**Figure S11.** 2-S1.18—SEM image of cement interface for 1.18 mm.

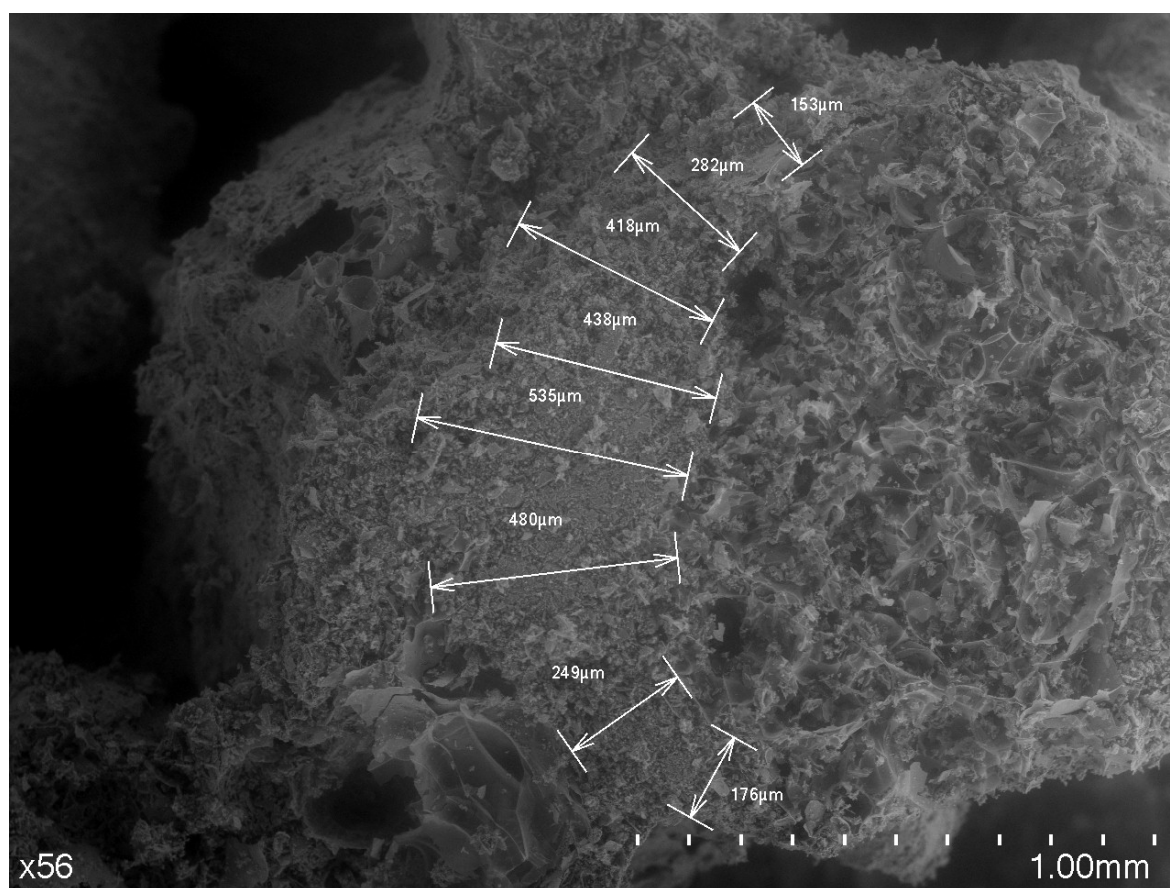

Figure S12. 3-S1.18—SEM image of cement interface for 1.18 mm.

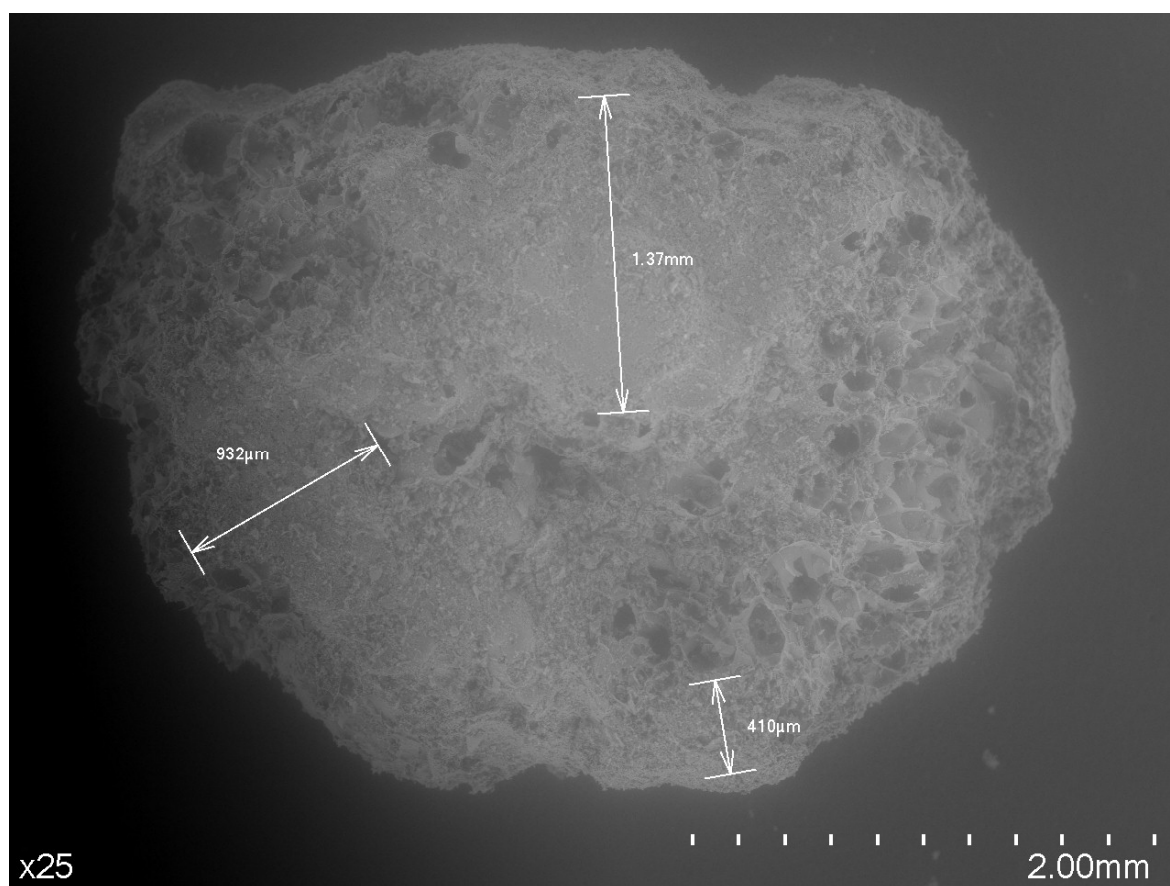

Figure S13. 1-S2.36—SEM image of cement interface for 2.36 mm.

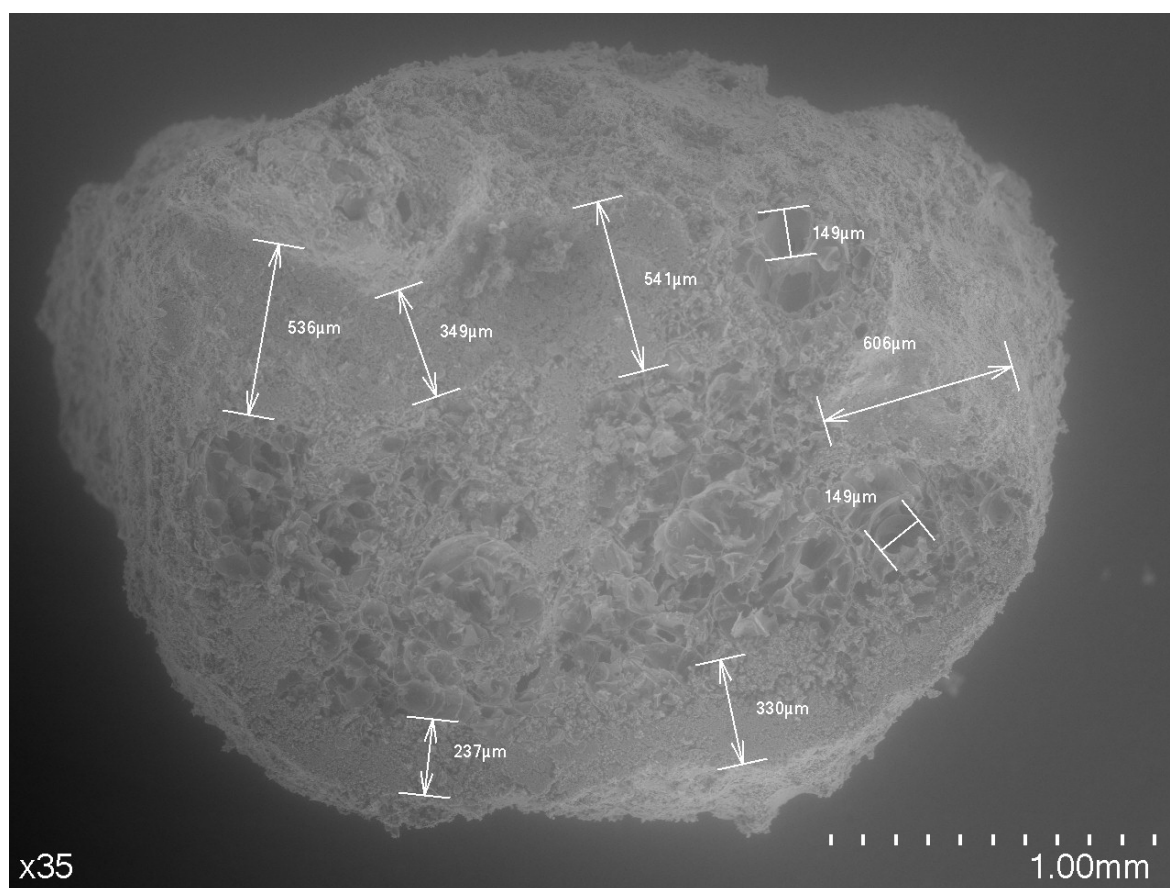

**Figure S14.** 2-S2.36—SEM image of cement interface for 2.36 mm.

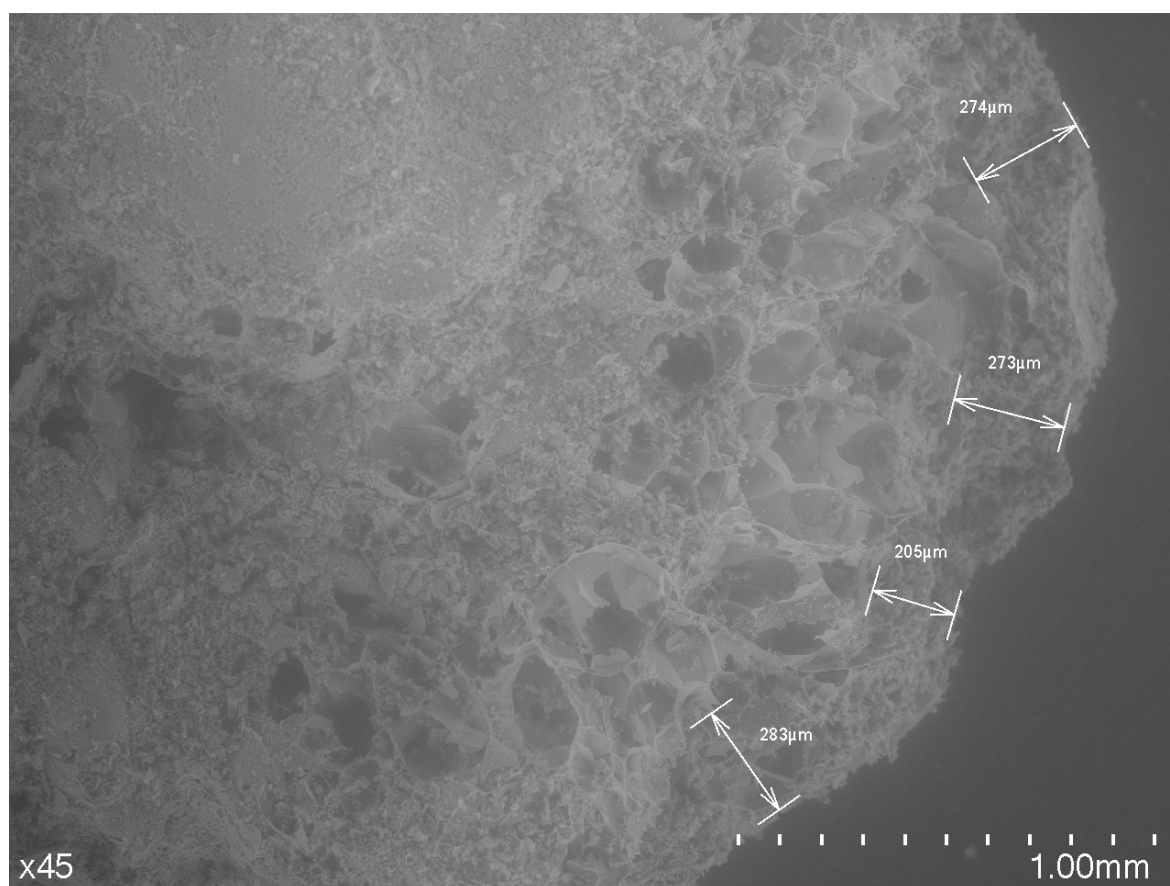

**Figure S15.** 3-S2.36—SEM image of cement interface for 2.36 mm.



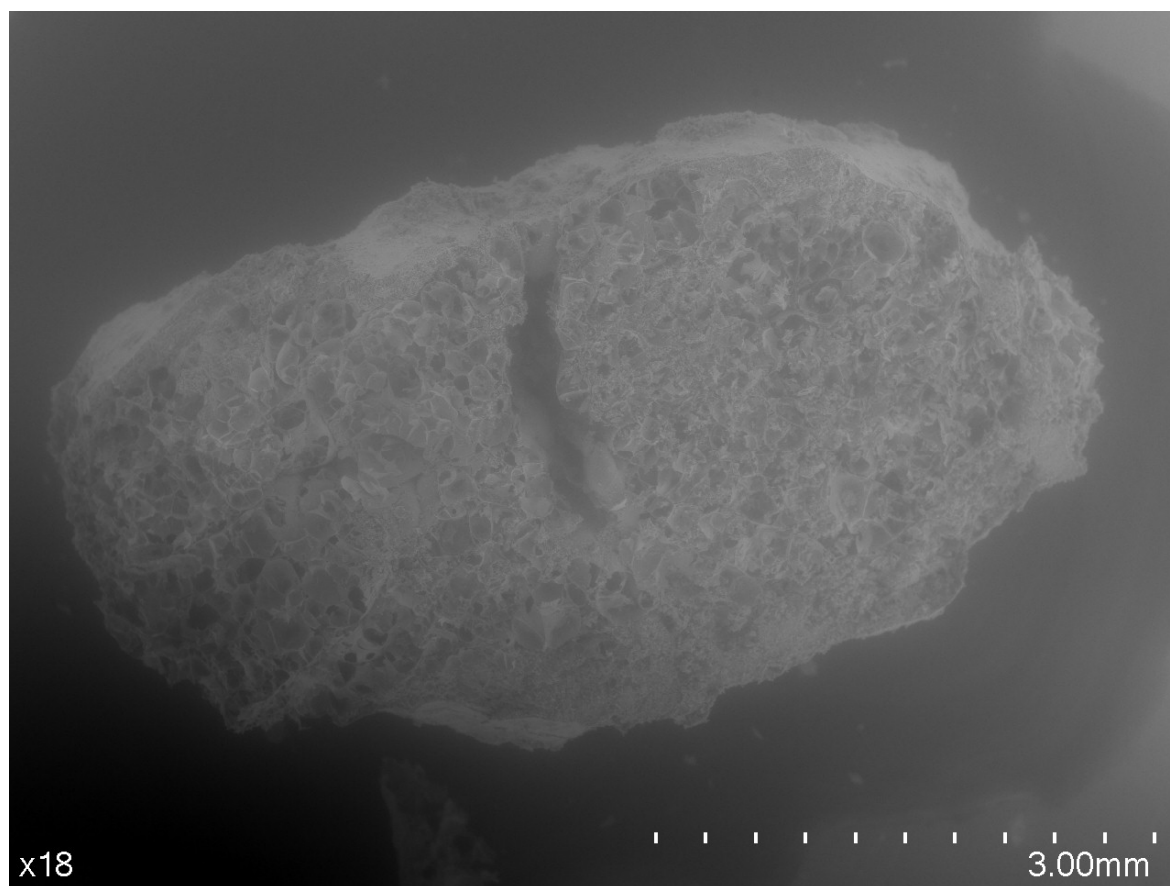

**Figure S16.** 1-S4.75—SEM image of cement interface for 4.75 mm.

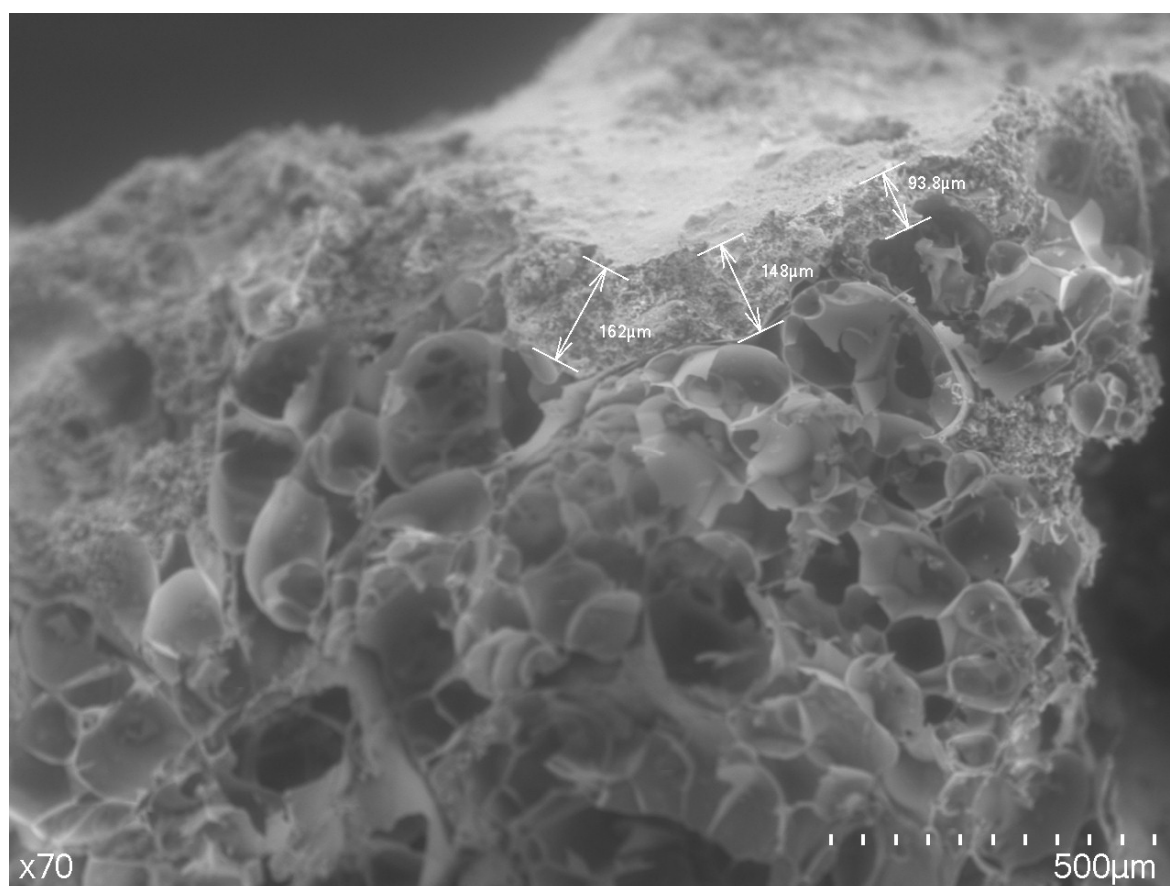

**Figure S17.** 2-S4.75—SEM image of cement interface for 4.75 mm.



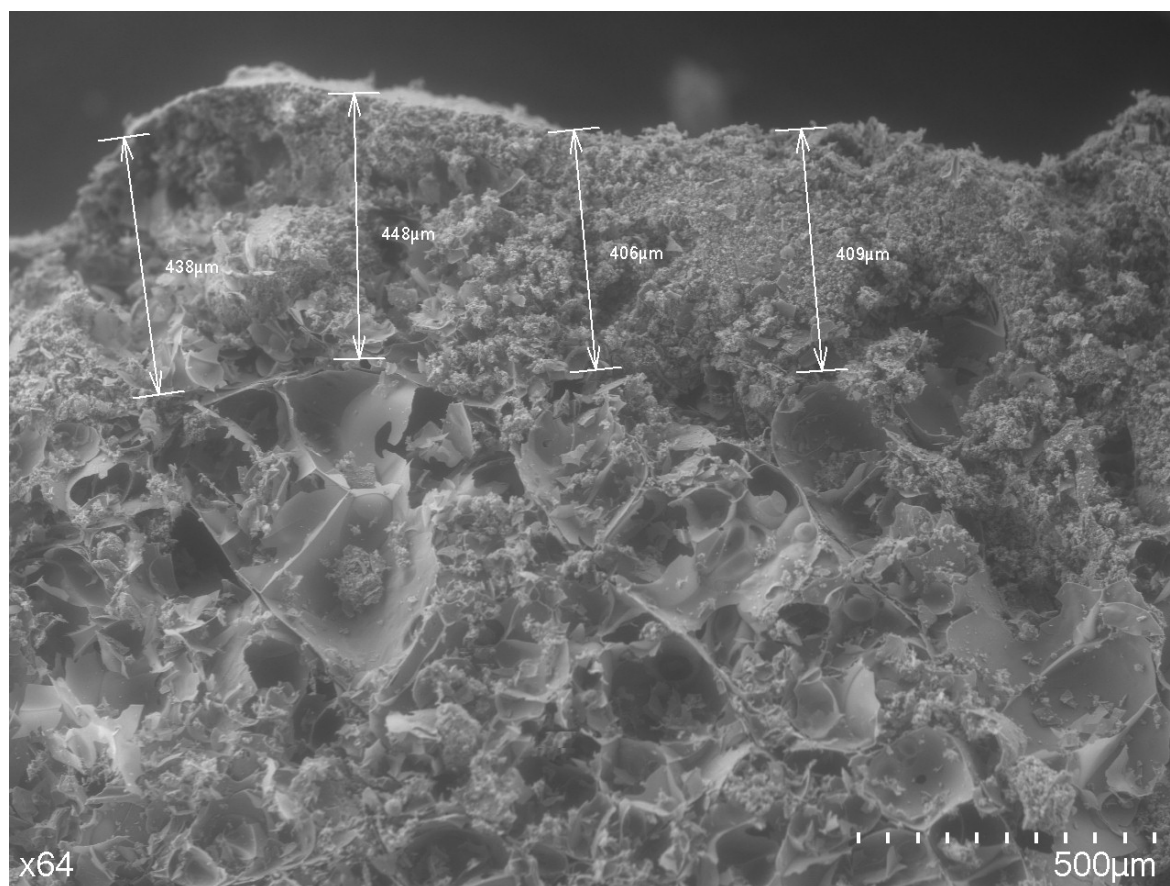

**Figure S18.** 3-S4.75—SEM image of cement interface for 4.75 mm.

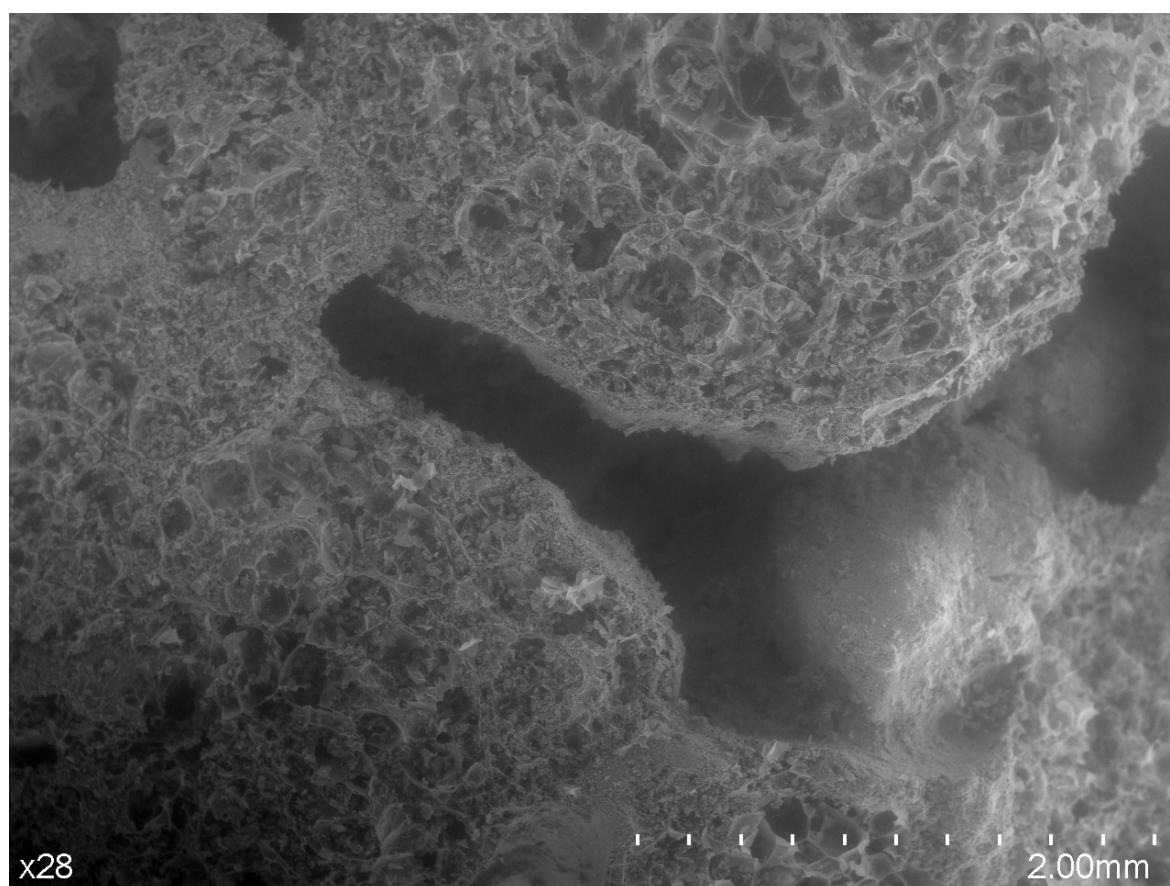

**Figure S19.** C-SG1—SEM image of expanded perlite and cement interface at C-SG.

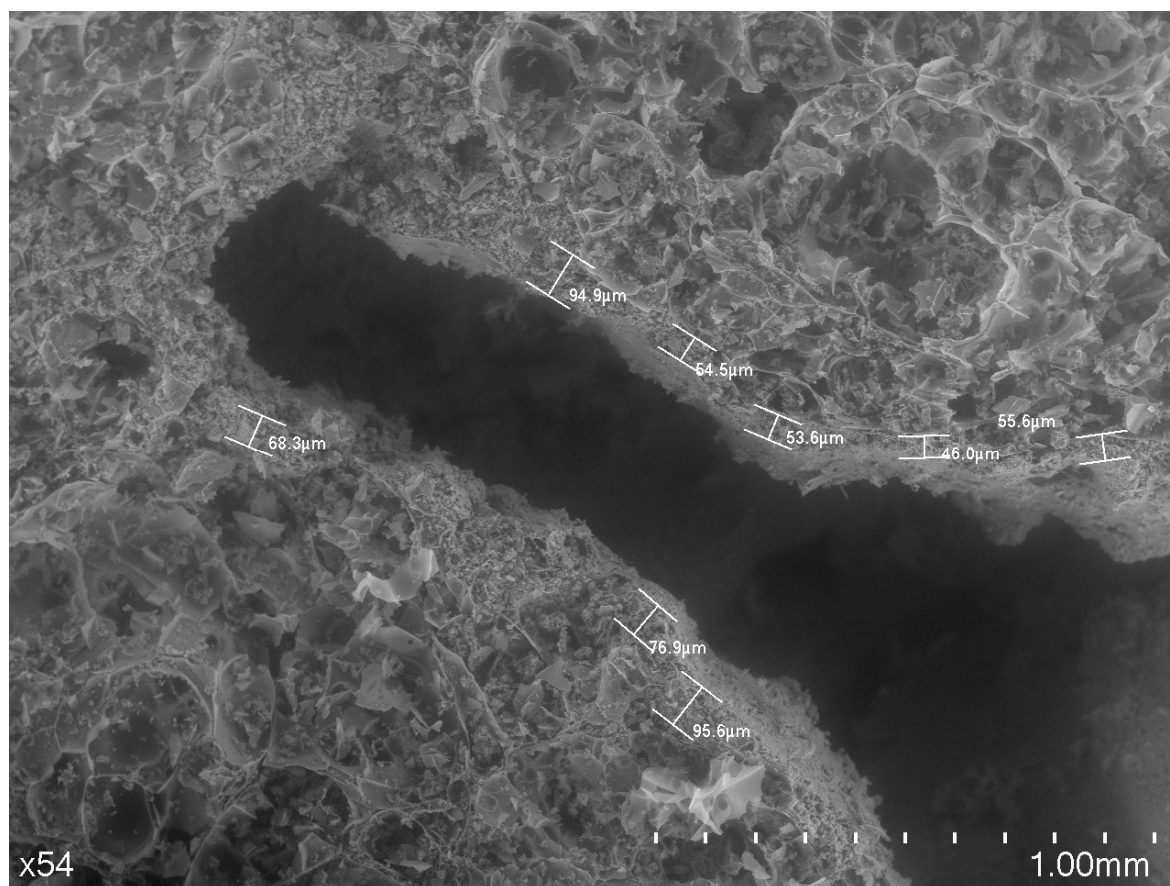

**Figure S20.** C-SG2—SEM image of expanded perlite and cement interface at C-SG.

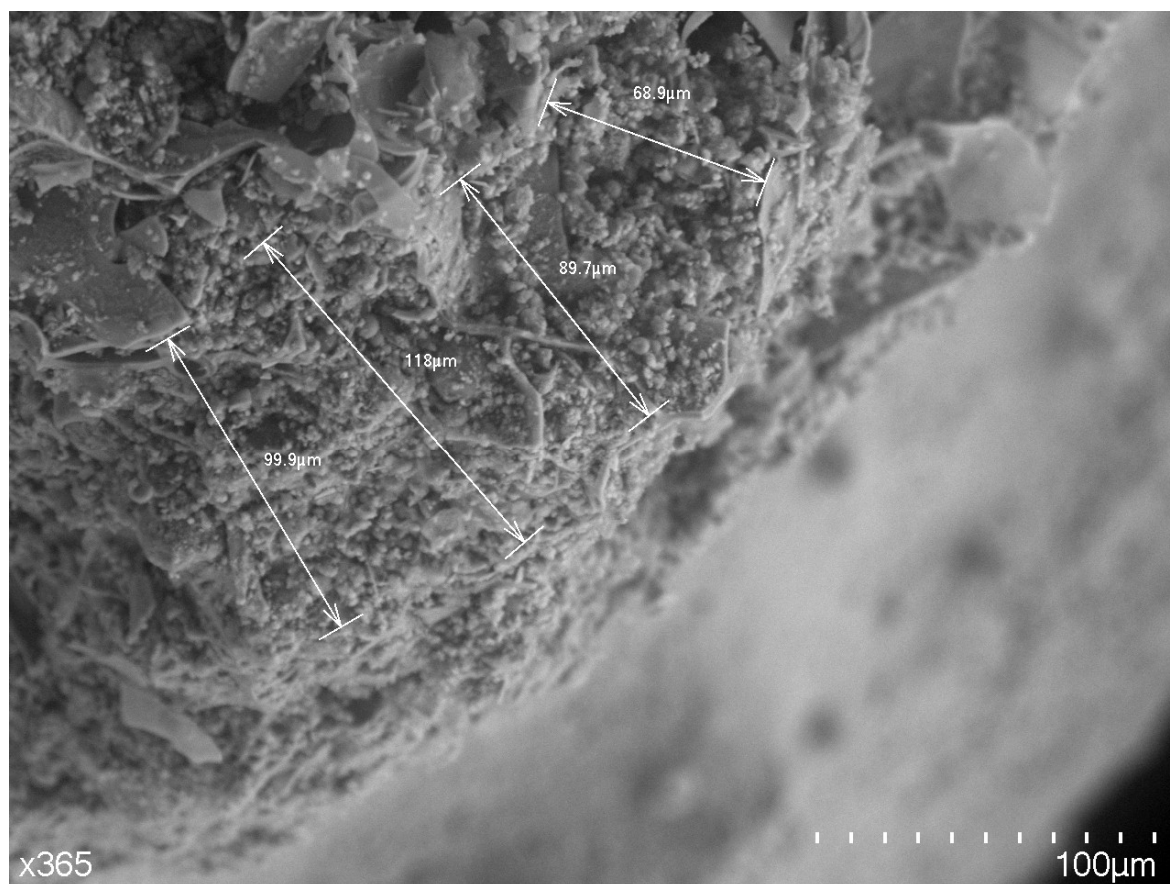

**Figure S21.** C-SG3—SEM image of expanded perlite and cement interface at C-SG.

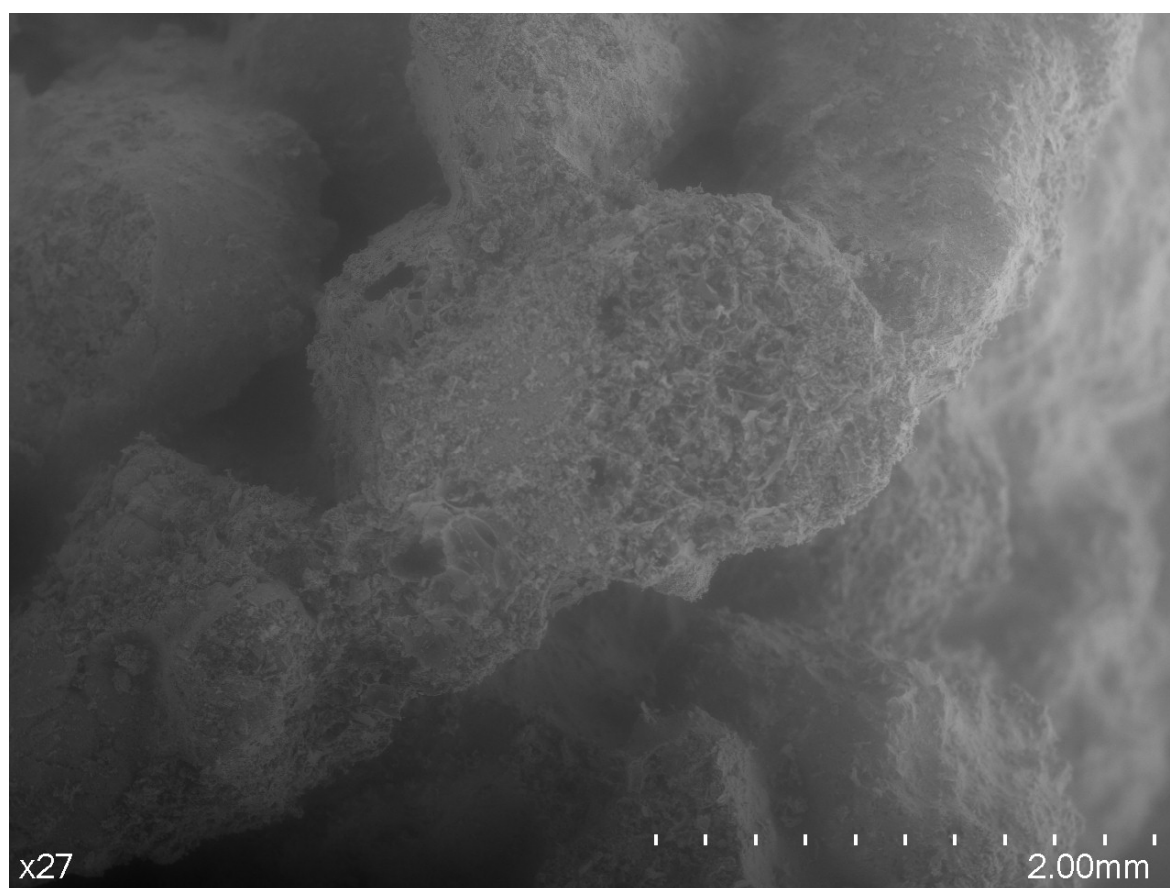

**Figure S22.** M-SG1—SEM image of expanded perlite and cement interface at M-SG.

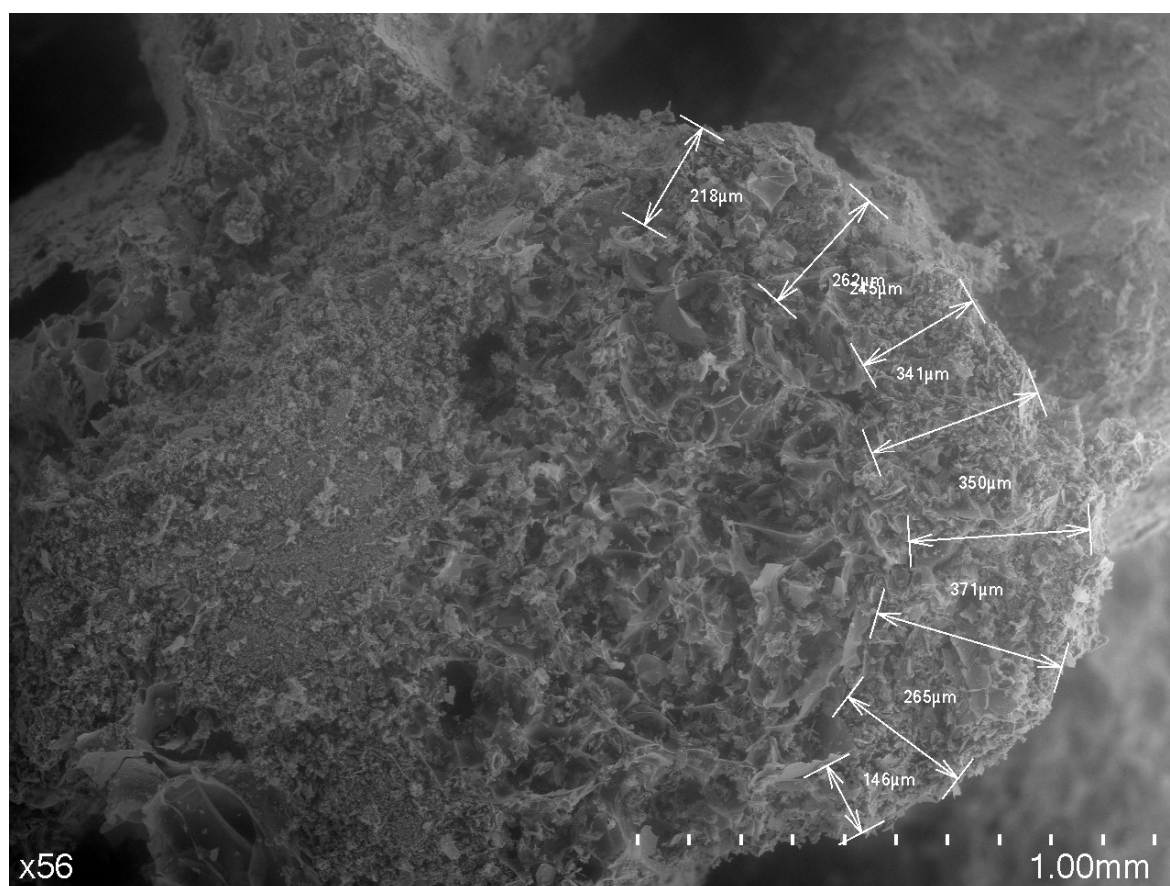

**Figure S23.** M-SG2—SEM image of expanded perlite and cement interface at M-SG.



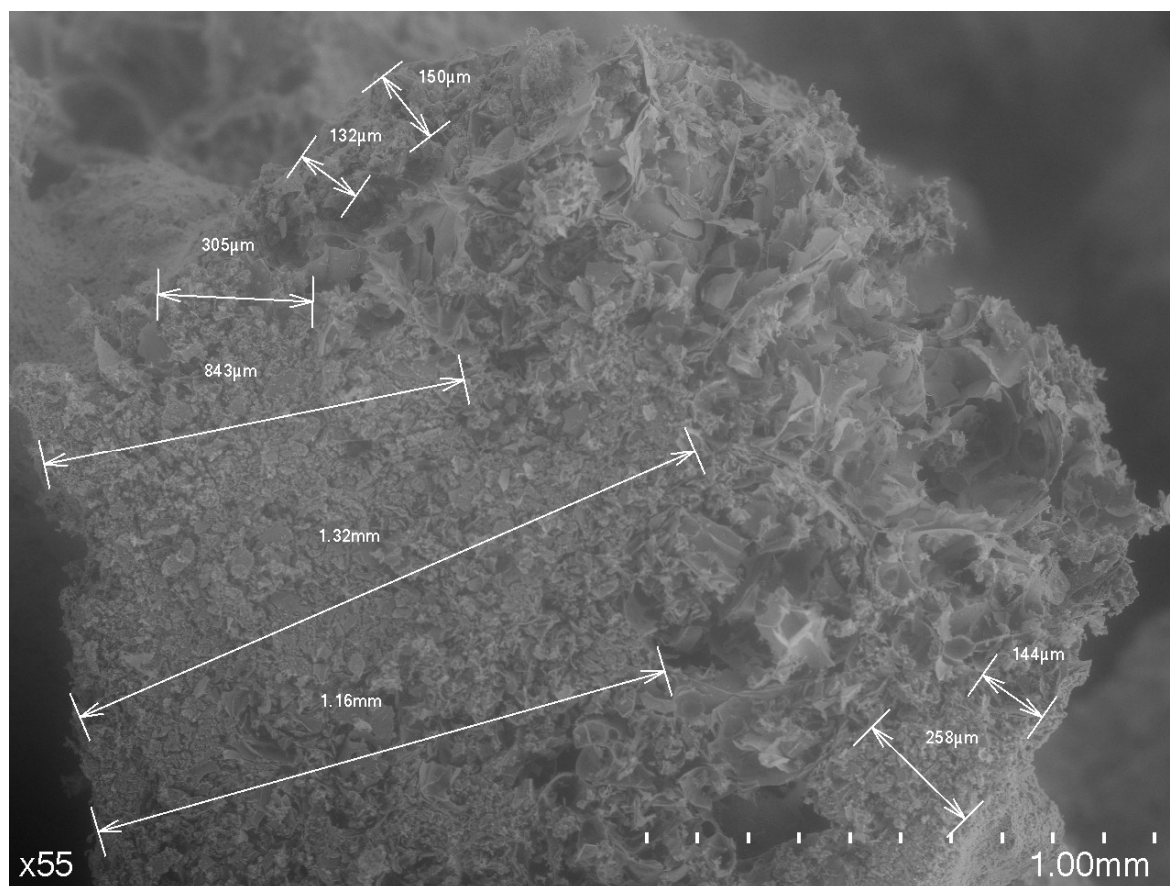

**Figure S24.** M-SG3—SEM image of expanded perlite and cement interface at M-SG.

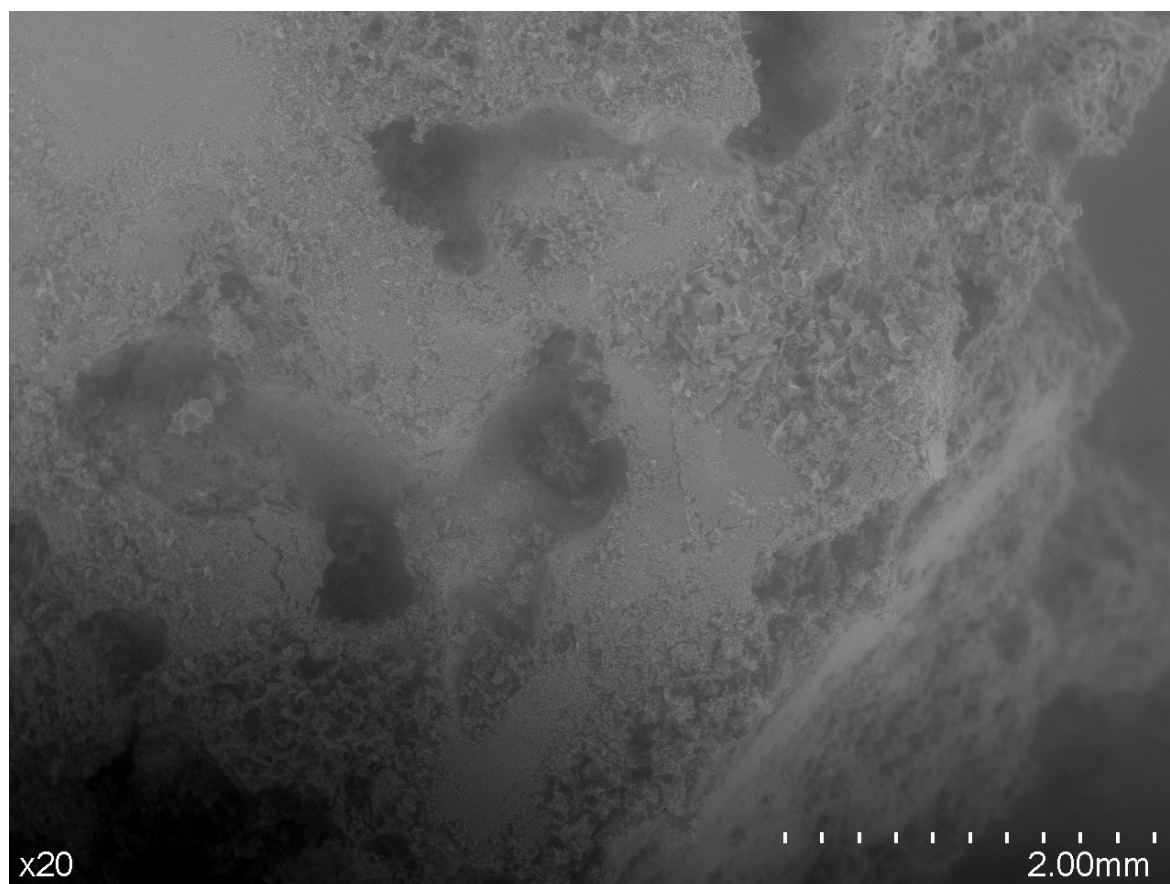

**Figure S25.** F-SG1—SEM image of expanded perlite and cement interface at F-SG.

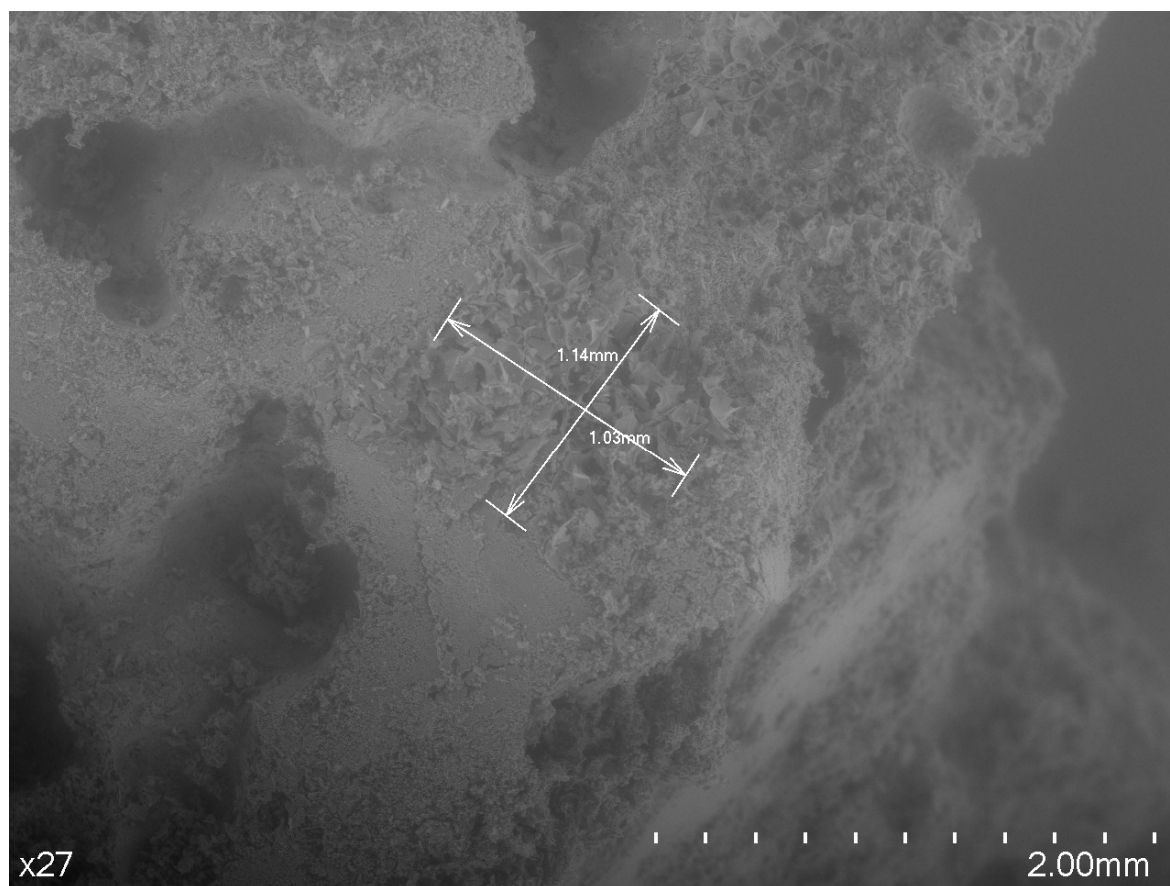

**Figure S26.** F-SG2—SEM image of expanded perlite and cement interface at F-SG.

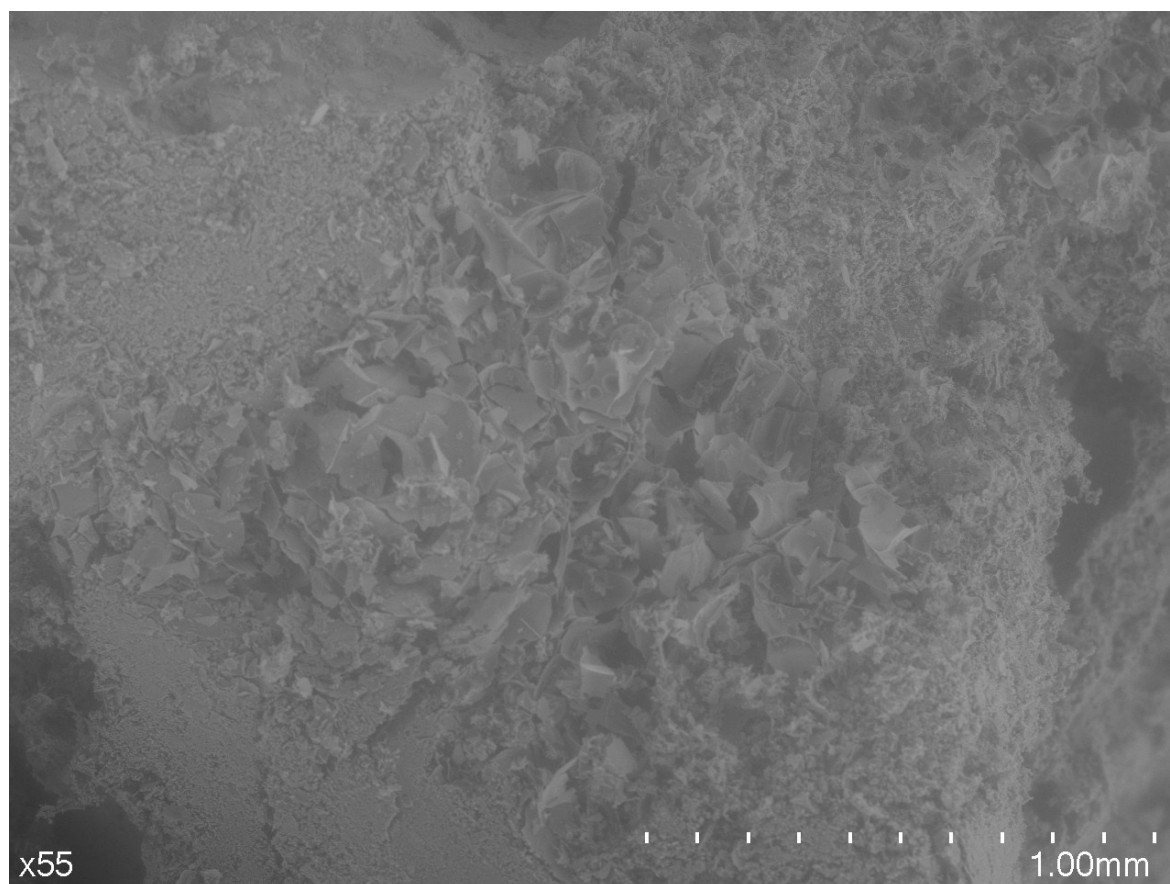

**Figure S27.** F-SG3—SEM image of expanded perlite and cement interface at F-SG.
